# Supplementary material for: Bioinformatics Analysis Highlight Differentially Expressed CCNB1 and PLK1 Genes as Potential Anti-Breast Cancer Drug Targets and Prognostic Markers
Source: MDPI journal article supplement (doi:10.3390/genes13040654), 2022-04-07
Supplement: s1 [file s1]

**Figure S1.** Flow chart of analysis

**Figure S2.** The demonstration of WGCNA process. **(A)** Sample clustering tree diagram. The y-axis is the height of the cluster tree, and the x-axis represents sample, which finally indicates the clustering of all samples. **(B)** Screening of Soft threshold(power). The y-axis  $R^2$  in the left is the square of the correlation coefficient of  $\log_{10}(k)$  and  $\log_{10}(p(k))$ ,  $\log_{10}(k)$  is the logarithm of the node with degree  $k$ ,  $\log_{10}(p(k))$  is the logarithm of the probability of the node with degree  $k$ , and  $\log_{10}(k)$  and  $\log_{10}(p(k))$  are negatively correlated. The x-axis is soft threshold (power). The red line is the correlation coefficient  $R^2 = 0.9$ . The right is the verification diagram. The y-axis is connectivity and the x-axis is soft threshold (power). **(C)** Clustering tree of DEGs with module colors. The lower part is gene clustering of each module, and the upper part is the corresponding clustering tree.

**Figure S3.** Immunohistochemical staining data of hub genes in breast cancer tissue samples and normal tissue samples were obtained from the HPA database. The immunohistochemical staining data of *BUB1*, *BUB1B* and *NDC80* in breast tissue were not included in HPA database.

**Figure S4.** K-M analysis of 13 hub genes except *CCNB1* and *PLK1*. The x-axis is the survival time, and the death time or the last follow-up time of the patient is taken as the final survival time of the patient. The y-axis is survival rate. The samples were divided into “high” (Red) and “low” (Blue) gene expression groups, and the segmentation threshold was the median.  $P < 0.05$  was considered statistically significant.

**Figure S5.** Further analysis of *CCNB1* and *PLK1*. **(A)** The expression level of *CCNB1* in different breast cancer stages. **(B)** The expression level of *PLK1* in different breast cancer stages. The x-axis is stage, the y-axis is the expression quantity. **(C)** The expression level of *CCNB1* isoforms. **(D)** The expression level of *PLK1* isoforms. The C-D x-axis is the different isomers of *CCNB1* and *PLK1*, and the y-axis is the expression level. The thick black or white bar in the middle of each violin chart represents the quartile range, the small black line extending from it represents the 95% confidence interval, and the white dot or black line in the middle is the median.

**Figure S6.** Expression of *CCNB1* and *PLK1* in other cancer tissues. **(A)** Expression of *CCNB1* in different cancer tissues and corresponding normal tissues. **(B)** Expression of *PLK1* in different cancer tissues and normal tissues. The x-axis “T” (Red) represents cancer tissue sample and “N” (Green) represents normal tissue sample. The y-axis is the  $\log_2$  of the gene expression in the sample.

**Figure S7.** GO and KEGG enrichment analysis of the highest score modules obtained from MCODE. The left is the genes enriched in each pathway, and the color is the differential multiple gene expression.

**Table S1.** The number of genes in each module.

**Table S2.** Core modules.

**Table S3.** MCC, Degree, and Closeness analysis results.

**Table S4.** Five enrichment pathways of the core module.

Figure S1

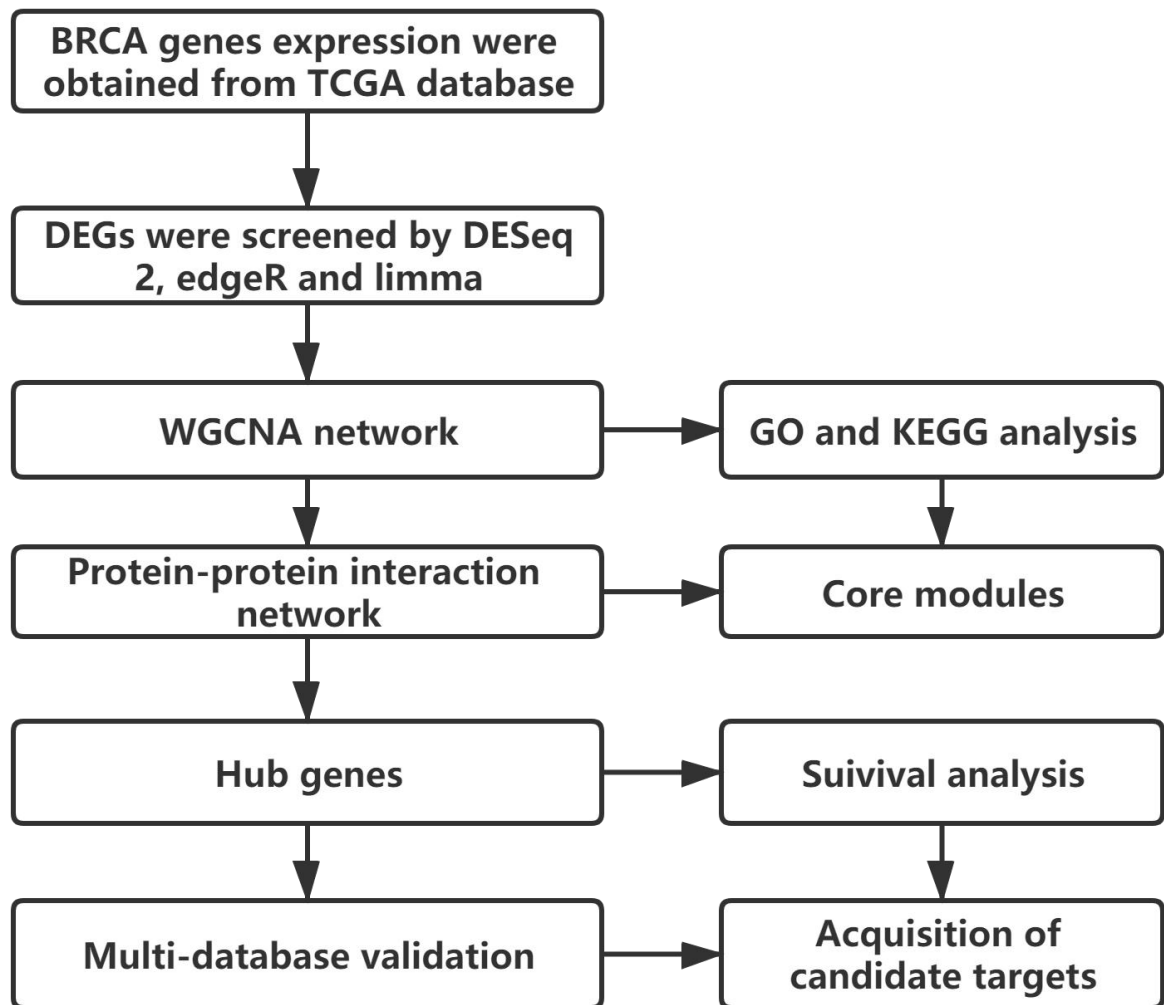

Figure S2

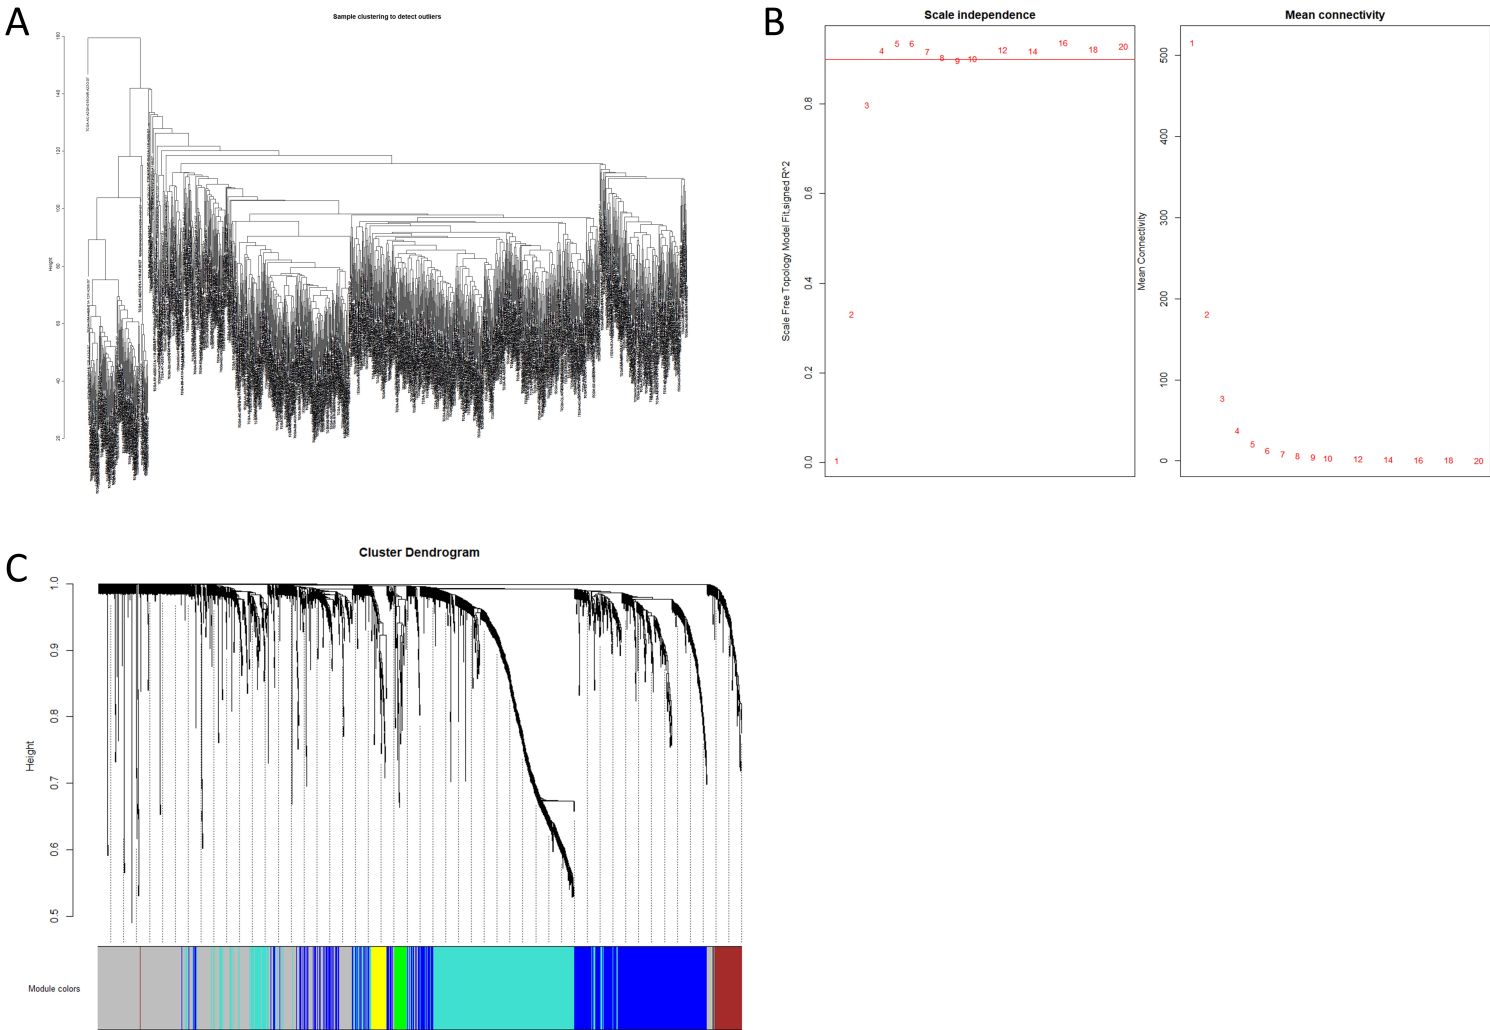

Figure S3

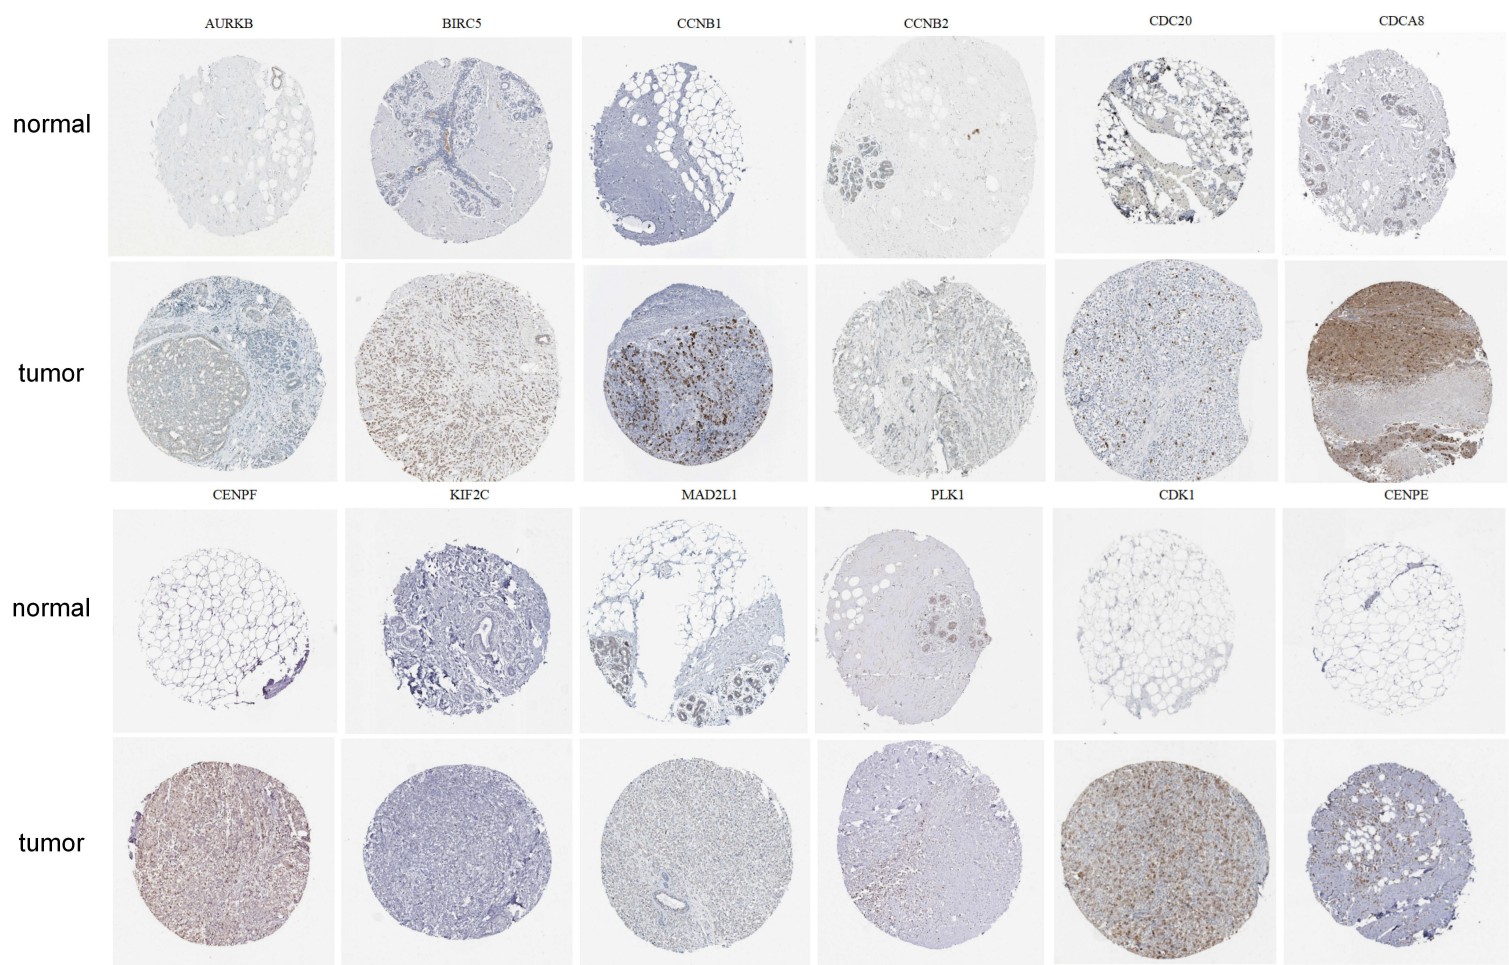



Figure S4

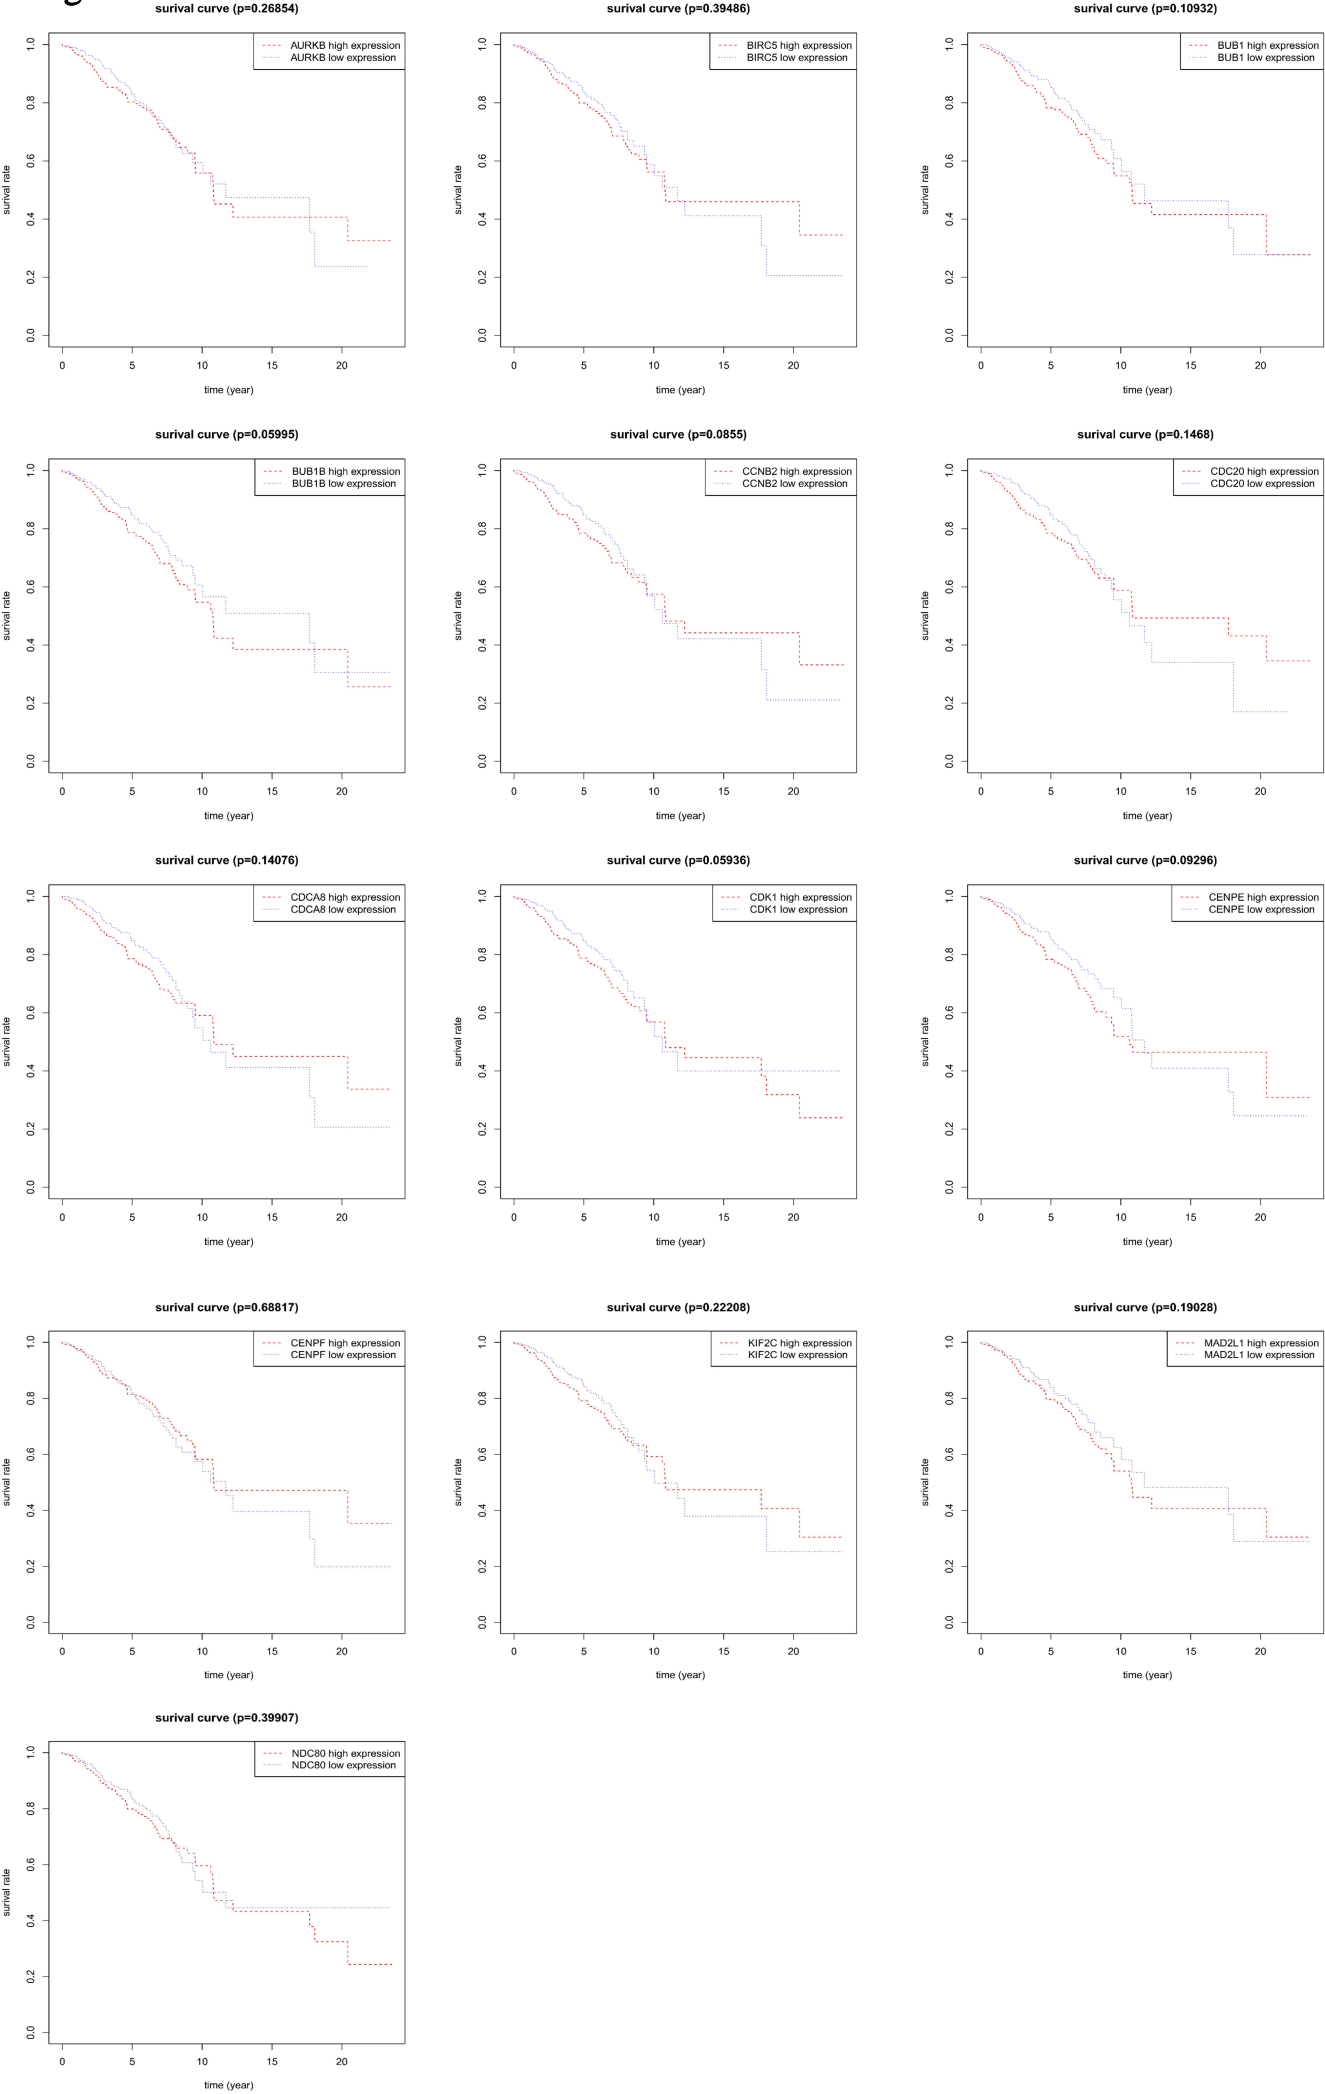

Figure S5

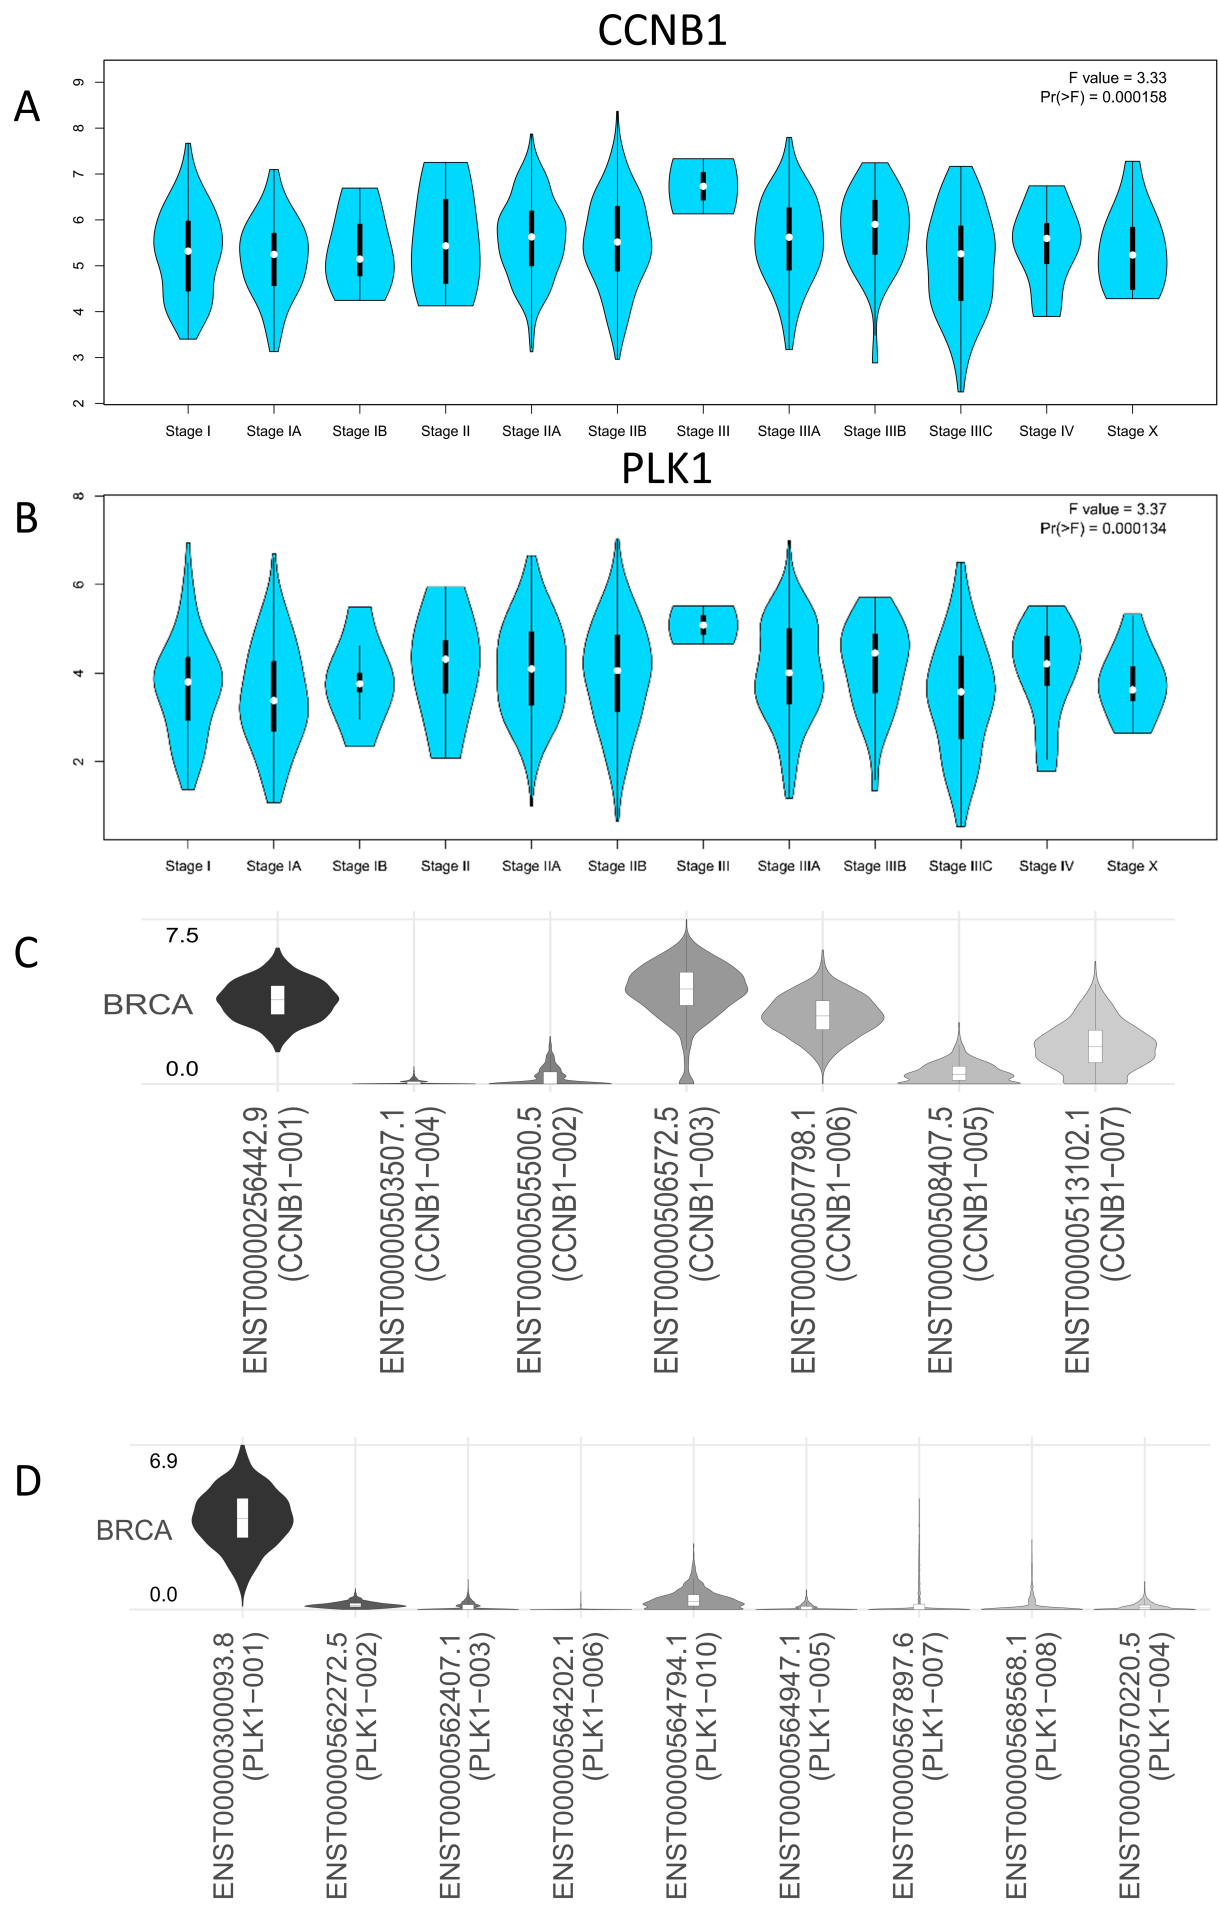

Figure S6

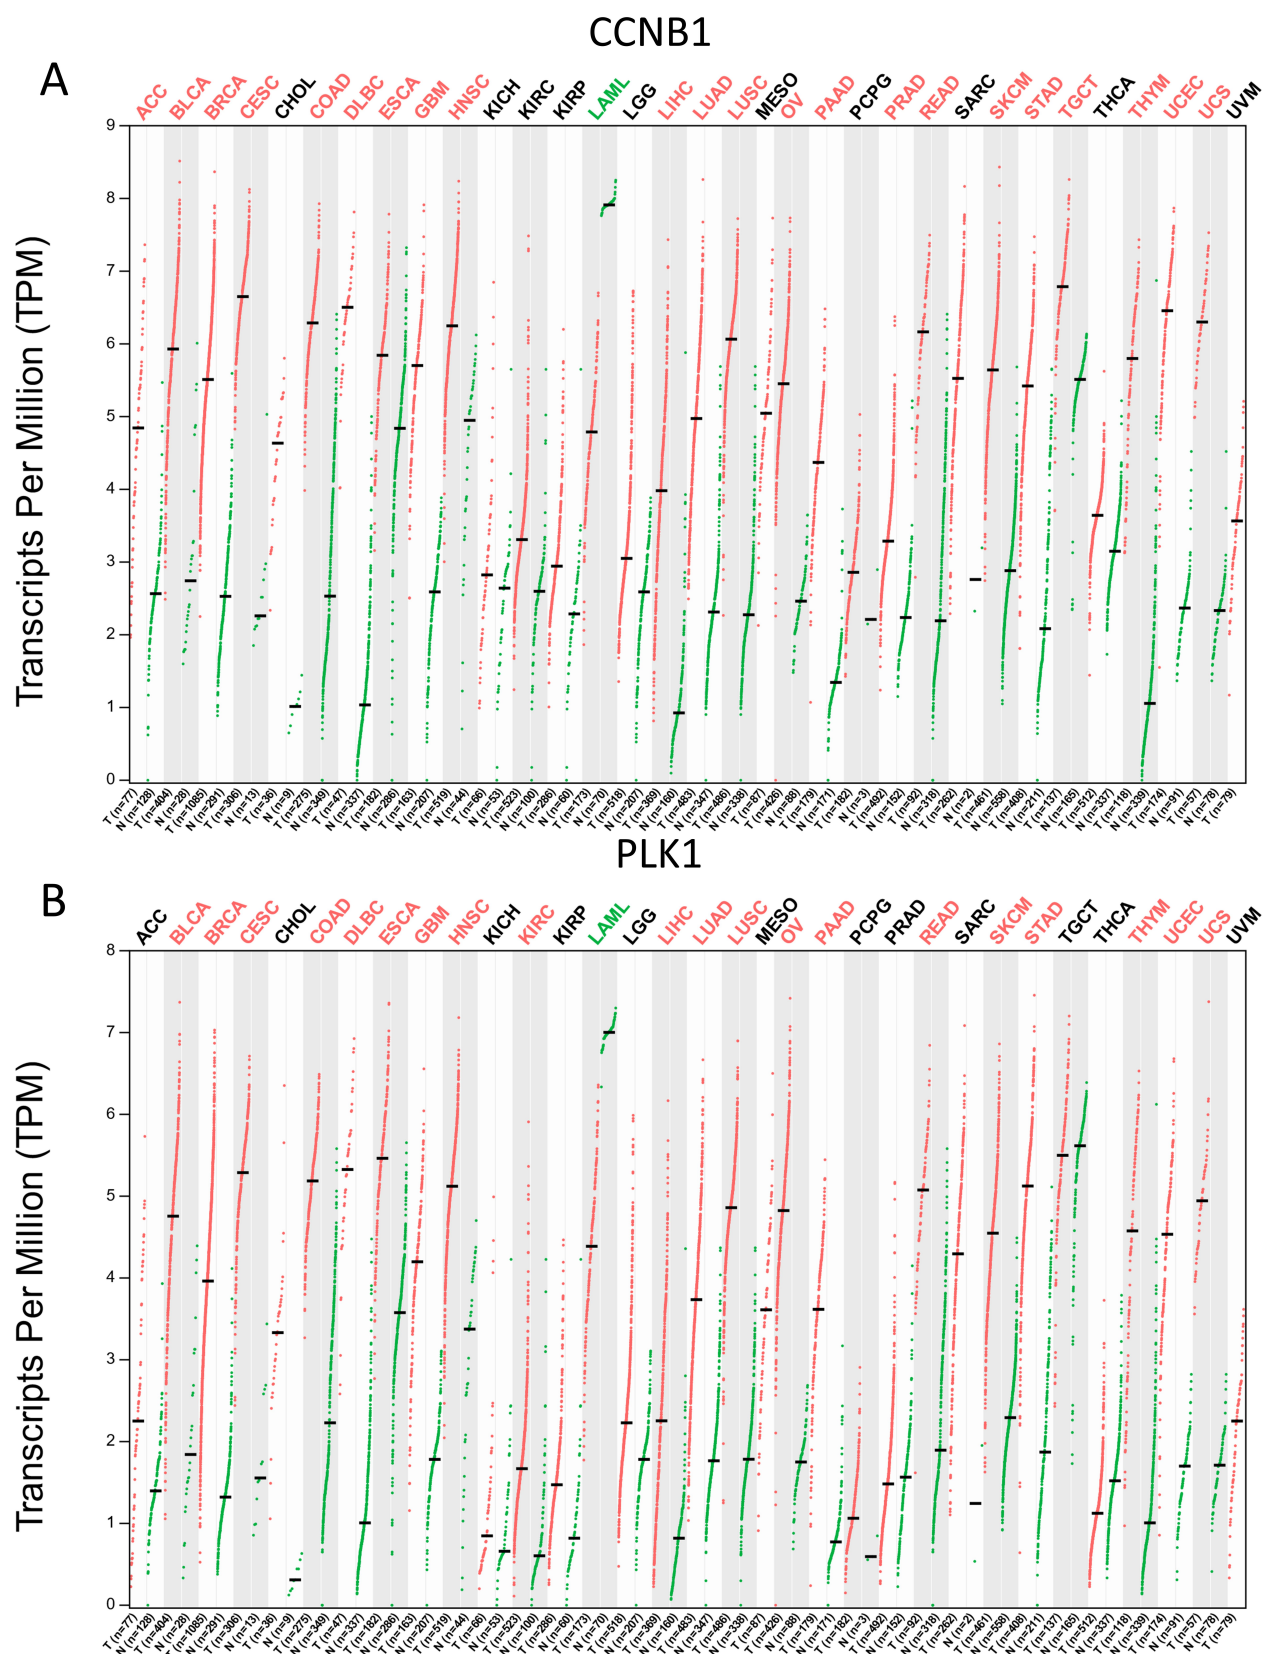

Figure S7

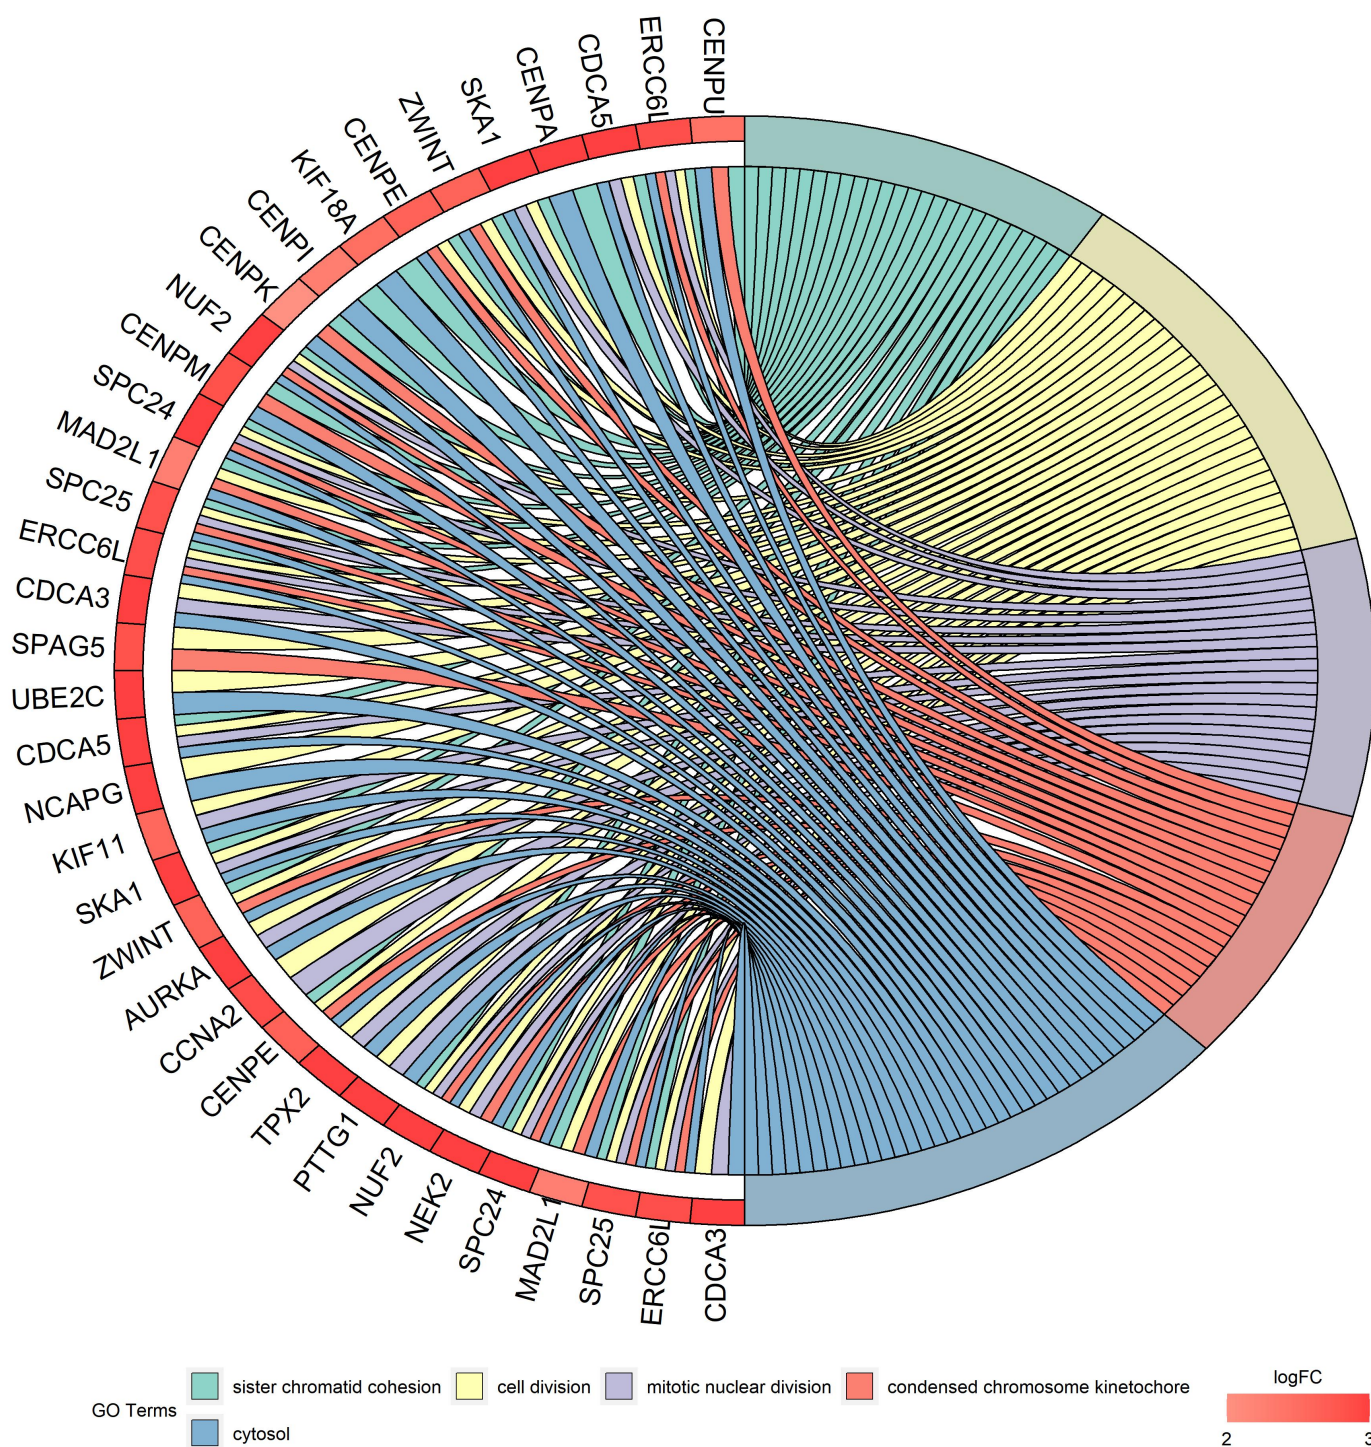



**Table S1.** The number of genes in each module

| Color of module | Number of genes |
|-----------------|-----------------|
| blue            | 594             |
| brown           | 93              |
| green           | 38              |
| grey            | 655             |
| turquoise       | 600             |
| yellow          | 52              |

**Table S2.** Core modules

| Cluster | Score  | Nodes | Edges | Node IDs                                                                                                                                                                                                                                                                                       |
|---------|--------|-------|-------|------------------------------------------------------------------------------------------------------------------------------------------------------------------------------------------------------------------------------------------------------------------------------------------------|
| 1       | 23.561 | 42    | 483   | CDCA5, CASC5, SGOL1, KIF15, TOP2A, ZWINT, TTK, SPC24, CCNA2, CENPI, CENPM, MELK, ERCC6L, MAD2L1, NUSAP1, KIF20A, CENPK, NUF2, CENPE, CENPA, KIF18A, PTTG1, CEP55, KIF4A, CDCA3, ESPL1, TPX2, PRC1, NCAPG, PBK, KIF11, AURKA, KIF23, ASPM, DLGAP5, RRM2, NEK2, SKA1, SPC25, SPAG5, CENPU, UBE2C |
| 2       | 16     | 18    | 136   | CDK1, NDC80, CCNB1, KIF2C, MKI67, BIRC5, BUB1B, PLK1, HJURP, KIAA0101, CDCA8, CCNB2, CDC20, RACGAP1, FOXM1, CENPF, AURKB, BUB1                                                                                                                                                                 |
| 3       | 10     | 19    | 90    | ORC6, POLE2, BLM, RAD51, DNA2, EME1, H2AFX, CDC7, BRCA2, XRCC2, MCM2, CDT1, CLSPN, RMI2, ORC1, BRIP1, EXO1, RAD51AP1, MCM10                                                                                                                                                                    |
| 4       | 7      | 7     | 21    | COL5A2, COL5A1, COL11A1, P4HA3, COL22A1, COL10A1, COL1A1                                                                                                                                                                                                                                       |
| 5       | 7      | 7     | 21    | NOTUM, VGF, PROC, TMEM132A, CDH2, FN1, MATN3                                                                                                                                                                                                                                                   |
| 6       | 5      | 5     | 10    | KIFC1, KIF1A, KIFC2, KIF18B, KIF26B                                                                                                                                                                                                                                                            |
| 7       | 5      | 5     | 10    | RAMP1, PTH1R, SCT, ADM2, ADRB2                                                                                                                                                                                                                                                                 |
| 8       | 4.8    | 6     | 12    | MMP9, MMP13, MMP1, SDC1, MMP3, ACAN                                                                                                                                                                                                                                                            |
| 9       | 4.571  | 8     | 16    | HTR1D, GRM8, GPR68, NPW, GPR143, NMU, F2RL2, CCL20                                                                                                                                                                                                                                             |
| 10      | 4.5    | 5     | 9     | OLR1, STBD1, ADAM8, CLEC5A, PLAUR                                                                                                                                                                                                                                                              |
| 11      | 4      | 4     | 6     | ZBTB16, UBE2S, CCNF, PARK2                                                                                                                                                                                                                                                                     |
| 12      | 4      | 4     | 6     | ISG15, IRF7, OASL, IFI6                                                                                                                                                                                                                                                                        |
| 13      | 3.333  | 4     | 5     | TYMS, CDC45, MCM4, CDC6                                                                                                                                                                                                                                                                        |
| 14      | 3      | 5     | 6     | E2F1, CDC25C, CCNE1, PKMYT1, CDC25A                                                                                                                                                                                                                                                            |
| 15      | 3      | 3     | 3     | GINS4, GINS1, GINS2                                                                                                                                                                                                                                                                            |
| 16      | 3      | 3     | 3     | KRT19, KRT18, KRT8                                                                                                                                                                                                                                                                             |



**Table S3.** MCC, Degree, and Closeness analysis results

| MCC    | Degree | Closeness |
|--------|--------|-----------|
| CDK1   | CDK1   | CDK1      |
| BUB1   | CDC20  | CDC20     |
| BUB1B  | CCNB1  | CCNA2     |
| CDC20  | CCNA2  | CCNB1     |
| CCNB2  | CCNB2  | CCNB2     |
| CCNB1  | BUB1   | BUB1      |
| KIF2C  | AURKB  | PLK1      |
| NDC80  | BUB1B  | AURKB     |
| CDCA8  | PLK1   | KIF11     |
| CENPF  | CDCA8  | BUB1B     |
| BIRC5  | KIF11  | CDCA8     |
| AURKB  | KIF2C  | TOP2A     |
| PLK1   | TOP2A  | KIF2C     |
| MAD2L1 | MAD2L1 | MAD2L1    |
| CENPE  | KIF20A | NDC80     |
| NUF2   | NDC80  | BIRC5     |
| ESPL1  | CENPE  | KIF20A    |
| CENPA  | BIRC5  | ASPM      |
| SGOL1  | CENPF  | CENPE     |
| KIF18A | ASPM   | CENPF     |

**Table S4.** Five enrichment pathways of the core module

| Category         | Term                                        | Count | %    | Genes                                                                                                                                                                              | FDR      |
|------------------|---------------------------------------------|-------|------|------------------------------------------------------------------------------------------------------------------------------------------------------------------------------------|----------|
| GOTERM_BP_DIRECT | GO:0007062~sister chromatid cohesion        | 15    | 37.5 | CENPU,ERCC6L,CDCA5, CENPA,SKA1,ZWINT,CE NPE,KIF18A,CENPI,CEN PK,NUF2,CENPM,SPC24, MAD2L1,SPC25                                                                                     | 1.01E-19 |
| GOTERM_BP_DIRECT | GO:0051301~cell division                    | 19    | 47.5 | ERCC6L,CDCA3,SPAG5, UBE2C,CDCA5,NCAPG,K IF11,SKA1,ZWINT,AURK A,CCNA2,CENPE,TPX2,P TTG1,NUF2,NEK2,SPC24, MAD2L1,SPC25                                                               | 1.32E-18 |
| GOTERM_BP_DIRECT | GO:0007067~mitotic nuclear division         | 17    | 42.5 | ERCC6L,CDCA3,CDCA5, KIF11,SKA1,KIF15,AURK A,CCNA2,ASPM,TPX2,PT TG1,NUF2,PBK,NEK2,SP C24,CEP55,SPC25                                                                                | 5.17E-18 |
| GOTERM_CC_DIRECT | GO:0000777~condensed chromosome kinetochore | 12    | 30   | CENPU,CENPE,ERCC6L, SPAG5,NUF2,CENPK,CE NPM,NEK2,SPC24,ZWIN T,MAD2L1,SPC25                                                                                                         | 1.32E-15 |
| GOTERM_CC_DIRECT | GO:0005829~cytosol                          | 29    | 72.5 | ERCC6L,CDCA3,CDCA5, NCAPG,KIF11,CENPA,SK A1,AURKA,KIF15,PTTG1 ,NUF2,NEK2,CENPU,RR M2,UBE2C,KIF23,ZWINT, CENPE,TPX2,KIF18A,ES PL1,PRC1,CENPI,KIF4A, CENPK,CENPM,SPC24,M AD2L1,SPC25 | 1.02E-11 |
